# Supplementary material
Source: PubMed Central journal article supplement (PMC4322257)
Supplement: supp_JCO.2014.56.2025_Data_Supplement_JCO.2014.56.2025.pdf [file supp_JCO.2014.56.2025_Data_Supplement_JCO.2014.56.2025.pdf]

**Chemotherapy-refractory Diffuse Large B-cell Lymphoma and Indolent B-cell  
Malignancies Can Be Effectively Treated with Autologous T Cells Expressing an  
Anti-CD19 Chimeric Antigen Receptor**

**Kochenderfer, et al**

## Supplemental Methods

### Anti-CD19-CAR T-cell preparation

PBMC from each patient were suspended in AIM V medium (Invitrogen) with 5% human AB serum (Gemini) and 300 international units/mL IL-2 (Novartis). T cell proliferation was initiated by adding 50 ng/mL of the anti-CD3 monoclonal antibody OKT3 (Ortho Biotech). Six-well plates were coated with Retronectin™ (Takara Bio Inc.), and gammaretroviruses encoding the anti-CD19 CAR were coated onto the plates as previously described.<sup>1</sup> Two days after initiation of the PBMC cultures,  $2 \times 10^6$  stimulated PBMC were added to each well of the virus-coated plates, and the plates were cultured overnight. The next day, the cells were returned to culture in AIM V medium with 5% human AB serum and 300 international units/mL of IL-2. Cells were infused into the patients on day 10 of culture. All cell products were assessed for potency by IFN $\gamma$  release and for CAR expression by anti-Fab antibody staining. Release criteria for clinical T-cell products were at least 200 pg/mL of IFN $\gamma$  release against CD19<sup>+</sup> targets in a standard enzyme-linked immunosorbant assay (ELISA) and at least 30% CAR expression on T cells as measured by anti-Fab flow cytometry. Cells were tested for sterility by bacteria culture, fungal culture, and mycoplasma PCR testing. Endotoxin testing was performed by limulus amoebocyte lysis assay, and replication competent retrovirus testing was performed by PCR. Cells were harvested and washed on day 10 of culture, and infused by intravenous infusion over 20 to 30 minutes.

## **CAR detection on transduced T cell cultures by anti-Fab antibody staining**

This method was used to determine the percentage of CAR<sup>+</sup> cells, and this percentage was used in calculating the total number of T cells to infuse into patients to achieve the target CAR<sup>+</sup> T cell doses. An example of this staining is shown in Figure 1. For each T cell culture that was analyzed, cells were stained with biotin-labeled polyclonal goat anti-mouse-F(ab)<sub>2</sub> antibodies (anti-Fab, Jackson ImmunoResearch) to detect the anti-CD19 CAR. The cells were then stained with phycoerythrin (PE)-labeled streptavidin (BD), anti-CD3, anti-CD4, and anti-CD8. The percentage of T cells that expressed the CAR was calculated by subtracting the percentage of untransduced CD3<sup>+</sup> cells that were stained with the anti-Fab antibody from the percentage of anti-CD19 CAR-transduced CD3<sup>+</sup> cells that were stained with the anti-Fab antibodies. Both the anti-CD19-CAR-transduced T cells and the untransduced T cells came from the same patient and were cultured identically.

## **Target cell lines used**

CD19-K562 are K562 cells (ATCC) transduced with full-length CD19 in our laboratory.<sup>2</sup>

NGFR-K562 are K562 cells transduced with the gene for low-affinity nerve growth factor in our laboratory.<sup>2</sup>

## **Enzyme-linked immunosorbent assay (ELISA)**

For ELISAs to detect serum cytokines, patient serum from various time-points was assayed directly by using commercial ELISA kits (Pierce) according to the instructions of the manufacturer.

### **CD107a assay**

Effector cells for CD107a assays were samples of the infused CAR-transduced T cells. For each effector cell sample that was tested, two tubes were prepared. One tube contained CD19-K562 cells, and the other tube contained NGFR-K562 cells. Both tubes contained effector cells, 1 ml of AIM-V medium+5% human serum, a titrated concentration of an anti-CD107a antibody (eBioscience, clone eBioH4A3), and 1  $\mu$ L of Golgi Stop (monesin, BD). All tubes were incubated at 37°C for 4 hours and then stained for CD3, CD4, and CD8.

### **Intracellular cytokine staining assay (ICCS)**

Effector cells for ICCS assays were samples of the infused CAR-transduced T cells. Two tubes were prepared. One tube contained CD19-K562 cells and the other tube contained NGFR-K562 cells. Both tubes contained effector cells, 1 ml of AIM-V medium+5% human serum, and 1  $\mu$ L of Golgi Plug (BD). All tubes were incubated at 37°C for 6 hours. The cells were surface stained with anti-CD3, anti-CD4, and anti-CD8. The cells were permeabilized, and intracellular staining was conducted for IFN $\gamma$

(BD, clone B27), IL-2 (BD, clone MQ1-17H12), and TNF (BD, clone MAb11) by following the instructions of the Cytotfix/Cytoperm kit (BD).

### **Ex vivo flow cytometry of B-lineage cells and T cell phenotype**

Blood B cells were defined as CD19<sup>+</sup> cells. Blood T cells were defined as CD3<sup>+</sup> cells. For the T-cell memory phenotype determination presented in Figure 5, live lymphocytes that were CAR<sup>+</sup> and CD3<sup>+</sup> were gated, and the percentage of cells expressing the various markers was determined on CD4<sup>+</sup> and CD8<sup>+</sup> cells. For the T-cell phenotype data presented in Figure 5, freshly thawed PBMC were stained with an anti-CAR monoclonal antibody that was provided by B. Jena and L. Cooper, M.D. Anderson Cancer Center.<sup>3</sup> This antibody was used to stain the lymph node mass aspirate shown in Figure 3 and to stain patient PBMC samples shown in Figure 5. The absolute number of blood CAR<sup>+</sup>CD3<sup>+</sup> cells was calculated by multiplying the peripheral blood lymphocyte count by the percentage of live lymphocytes that were CD3<sup>+</sup>CAR<sup>+</sup> as determined in the flow cytometry analysis. The following antibodies were used in the experiment presented in Figure 5.

| <b>Manufacturer</b> | <b>Part number</b> | <b>Antigen and flourochrome</b> |
|---------------------|--------------------|---------------------------------|
| eBioscience         | 11-0458-71         | CD45RA FITC                     |
| R&D                 | FAB197A            | CCR7 APC                        |
| BD                  | 557943             | CD3 Alexa700                    |
| Ebioscience         | 48-0088-42         | CD8 e450                        |
| Biologend           | 317444             | CD4 bv510                       |
| Biologend           | 322306             | CD57 FITC                       |
| Biologend           | 329918             | PD1 PE-Cy7                      |

## **Real-time qPCR to quantitate blood CAR<sup>+</sup> cells**

For each patient, DNA was extracted from PBMC collected before treatment and at multiple time-points after treatment. DNA was extracted by using a Qiagen DNeasy blood and tissue kit. DNA from each time-point was amplified in duplicate with a primer and probe set (Applied Biosystems) that was specific for the anti-CD19 CAR. Real-time PCR was carried out with a Roche Light Cycler 480 real-time PCR system. Similar to an approach used previously by other investigators and as published previously in our own work, we made serial 1:5 dilutions of DNA from the infused T cells of each patient into pretreatment DNA from the same patient, and we made standard curves by performing qPCR on this DNA<sup>4-7</sup>. We determined the percentage of the infused T cells that expressed the anti-CD19 CAR by flow cytometry as detailed above under “CAR detection on transduced T cells by anti-Fab antibody staining”. The standard curve was in units of %CAR<sup>+</sup> T cells. The highest point of the standard curve was the point derived from undiluted infused T-cell DNA. We assumed that only infused T cells with surface CAR expression detected by flow cytometry contained the CAR gene. This assumption probably underestimates the actual number of cells containing the CAR gene because all cells containing the CAR gene might not express the CAR protein on the cell surface. The percentage of PBMC that contained the CAR gene at each time-point was determined by comparing the qPCR results obtained with DNA of PBMC from each time-point to the qPCR results obtained from each patient’s infused-T-cell standard curve. All samples were normalized to  $\beta$ -actin with an Applied Biosystems  $\beta$ -actin control reagents kit. After the percentage of CAR<sup>+</sup> PBMC was determined by PCR, the absolute number of CAR<sup>+</sup> PBMC was calculated by multiplying the percentage

of CAR<sup>+</sup> PBMC by the sum of the absolute number of blood lymphocytes and monocytes.

### **Brain qPCR**

To determine the CD19 cDNA copy number, a quantified DNA plasmid that contained the sequence of full-length CD19 was serially diluted with salmon sperm DNA solution (10ng/μl) to use in generating a standard curve. The standard curve DNA and the human brain array cDNA were amplified by using TaqMan Fast Universal PCR Master Mix (2x) (Part Number. 4352042, Applied Biosystems). The following 20x premade primers/probe mix was used for CD19: Hs01047413-g1(Invitrogen). Results were normalized to the expression of the glyceraldehyde 3-phosphate dehydrogenase (GAPDH) housekeeping gene. GAPDH qPCR was performed with this primer and probe set: GAPDH-HMTM-Forward (TCGGAGTCAACGGATTTGG), 8 μM; GAPDH-HMTM-Reverse (CAATATCCACTTTACCAGAGTTAAAAGC), 8 μM; GAPDH-HMTM-probe (FAM-TTGGGCGCCTGGTCACCAGGG-Blackhole), 5 μM. The following human brain cDNA was used: TissueScan Human Brain Tissue qPCR Array (HBRT101, OriGene Technologies, Inc.)

### **Brain Immunohistochemistry**

A normal brain tissue array (US Biomax part number BNC17011) was stained with the clone LE-CD19 anti-CD19 antibody from Dako.

## References

1. Johnson LA, Morgan RA, Dudley ME, et al. Gene therapy with human and mouse T-cell receptors mediates cancer regression and targets normal tissues expressing cognate antigen. *Blood*. Jul 16 2009;114(3):535-546.
2. Kochenderfer JN, Feldman SA, Zhao Y, et al. Construction and preclinical evaluation of an anti-CD19 chimeric antigen receptor. *Journal of Immunotherapy*. Sep 2009;32(7):689-702.
3. Jena B, Maiti S, Huls H, et al. Chimeric Antigen Receptor (CAR)-Specific Monoclonal Antibody to Detect CD19-Specific T Cells in Clinical Trials. *PLoS ONE*. 2013;8(3).
4. Warren EH, Fujii N, Akatsuka Y, et al. Therapy of relapsed leukemia after allogeneic hematopoietic cell transplantation with T cells specific for minor histocompatibility antigens. *Blood*. 2010;115(19):3869-3878.
5. Morgan RA, Yang JC, Kitano M, Dudley ME, Laurencot CM, Rosenberg SA. Case report of a serious adverse event following the administration of t cells transduced with a chimeric antigen receptor recognizing ERBB2. *Molecular Therapy*. 2010;18(4):843-851.
6. Kochenderfer JN, Dudley ME, Feldman SA, et al. B-cell depletion and remissions of malignancy along with cytokine-associated toxicity in a clinical trial of anti-CD19 chimeric-antigen-receptor-transduced T cells. *Blood*. 2012;119(12):2709-2720.
7. Kochenderfer JN, Dudley ME, Carpenter RO, et al. Donor-derived CD19-targeted T cells cause regression of malignancy persisting after allogeneic hematopoietic stem cell transplantation. *Blood*. Dec 12 2013;122(25):4129-4139.



## Supplemental Table 1

### Patient lymphocyte counts at the time of apheresis

| Patient | Blood lymphocyte count at the time of apheresis (cells/ $\mu$ L)* |
|---------|-------------------------------------------------------------------|
| 1       | 560                                                               |
| 2       | 140                                                               |
| 3       | 460                                                               |
| 4       | 200                                                               |
| 5       | 630                                                               |
| 6       | 180                                                               |
| 7       | 1470                                                              |
| 8       | 280                                                               |
| 9       | 550                                                               |
| 10      | 1270                                                              |
| 11      | 320                                                               |
| 12      | 340                                                               |
| 13      | 1350                                                              |
| 14      | 640                                                               |
| 15      | 1020                                                              |

\*Normal range of blood lymphocytes is 1320-3570/ $\mu$ L.

## Supplemental Table 2

### Phenotype of Infused Cells

| Patient | % CD3+ cells expressing the CAR** | % of infused cells that were CD8+^ | % of infused cells that were CD4+^ | % CAR+ cells that were CCR7-neg CD45RA+* | % CAR+ cells that were CCR7-neg and CD45RA-neg* | % CAR+ cells that were CCR7+ and CD45RA-neg* | % CAR+ cells that were CCR7+ and CD45RA+* |
|---------|-----------------------------------|------------------------------------|------------------------------------|------------------------------------------|-------------------------------------------------|----------------------------------------------|-------------------------------------------|
| 1       | 73                                | 60                                 | 38                                 | 4.3                                      | 61                                              | 31                                           | 3.5                                       |
| 2       | 65                                | 55                                 | 43                                 | 5.7                                      | 31                                              | 53                                           | 10                                        |
| 3       | 75                                | 62                                 | 32                                 | 1.2                                      | 48                                              | 49                                           | 1.8                                       |
| 4       | 59                                | 42                                 | 42                                 | 0.4                                      | 70                                              | 29                                           | 0.1                                       |
| 5       | 72                                | 67                                 | 30                                 | 2.3                                      | 42                                              | 53                                           | 2.7                                       |
| 6       | 67                                | 27                                 | 68                                 | 3.2                                      | 41                                              | 52                                           | 3.7                                       |
| 7       | 84                                | 67                                 | 30                                 | 1.8                                      | 74                                              | 23                                           | 1.6                                       |
| 8       | 54                                | 45                                 | 29                                 | 39                                       | 21                                              | 9.3                                          | 31                                        |
| 9       | 82                                | 75                                 | 22                                 | 42                                       | 5.5                                             | 2.9                                          | 50                                        |
| 10      | 65                                | 39                                 | 56                                 | 0.6                                      | 63                                              | 35                                           | 0.8                                       |
| 11      | 63                                | 77                                 | 16                                 | 0.4                                      | 61                                              | 38                                           | 0.5                                       |
| 12      | 71                                | 46                                 | 49                                 | 2                                        | 65                                              | 31                                           | 1.7                                       |
| 13      | 84                                | 46                                 | 46                                 | 0.6                                      | 53                                              | 45                                           | 1                                         |
| 14      | 76                                | 76                                 | 22                                 | 9                                        | 42                                              | 36                                           | 13                                        |
| 15      | 63                                | 75                                 | 21                                 | 1                                        | 76                                              | 23                                           | 0.6                                       |

\*\*%CD3<sup>+</sup> cell expressing the CAR was calculated by subtracting the %CD3<sup>+</sup>CAR<sup>+</sup> events of untransduced T cells from the %CD3<sup>+</sup>CAR<sup>+</sup> events of CAR-transduced T cells; CAR expression was determined by anti-Fab staining. The percentages of infused cells that were either CD4<sup>+</sup> or CD8<sup>+</sup> were determined on total infused CD3<sup>+</sup> cells. The sum of the percentages of CD3<sup>+</sup>CD4<sup>+</sup> plus CD3<sup>+</sup>CD8<sup>+</sup> cells does not equal 100% because some CD3<sup>+</sup> cells were either double negative T cells (CD4-negative, CD8-negative) or double positive T cells (CD4<sup>+</sup>CD8<sup>+</sup>). \*CCR7 and CD45RA analysis was performed on CD3<sup>+</sup>CAR<sup>+</sup> cells.



## Supplemental Table 3

### Peak serum cytokine levels during the 2 weeks after CAR T-cell infusion

| Patient | Peak interferon $\gamma$ (pg/mL)          | Peak interleukin-6 (pg/mL)                | Peak tumor necrosis factor (pg/mL) |
|---------|-------------------------------------------|-------------------------------------------|------------------------------------|
| 1       | 165                                       | 882                                       | 40                                 |
| 2       | 43                                        | 206                                       | 0                                  |
| 3       | 61                                        | 201                                       | 17                                 |
| 4       | 426                                       | 104                                       | 14 (not increased from baseline)   |
| 5       | 396                                       | 2023                                      | 5                                  |
| 6       | 90                                        | 94                                        | 14                                 |
| 7       | 31                                        | 25 (only a 2-fold increase from baseline) | 1                                  |
| 8       | 374                                       | 1049                                      | 33                                 |
| 9       | 108                                       | 242                                       | 11                                 |
| 10      | 81                                        | 36                                        | 0                                  |
| 11      | 53                                        | 29 (only a 4-fold increase from baseline) | 0                                  |
| 12      | 243                                       | 39 (only a 3-fold increase from baseline) | 0                                  |
| 13      | 54 (only a 2-fold increase from baseline) | 20538                                     | 5                                  |
| 14      | 327                                       | 87                                        | 0                                  |
| 15      | 425                                       | 376                                       | 0                                  |

All cytokine levels were determined on patient serum by standard ELISA.

Except for the levels that are 5 pg/mL or less, unless otherwise noted, all peak cytokine levels were at least 5-fold higher than the pretreatment level.

## Supplemental Table 4

Central nervous system tissues studied by quantitative PCR and found to lack CD19 RNA

|                         |
|-------------------------|
| Frontal Lobe            |
| Temporal Lobe           |
| Occipital Lobe          |
| Parietal Lobe           |
| Paracentral Gyrus       |
| Postcentral Gyrus       |
| Olfactory Bulb          |
| Thalamus                |
| Corpus Callosum         |
| Hypothalamus            |
| Amygdala                |
| Hippocampus             |
| Caudate                 |
| Putamen                 |
| Substantia Nigra        |
| Pituitary Gland         |
| Cerebellum Grey Matter  |
| Cerebellum White Matter |
| Cerebellum Vermis       |
| Nucleus Accumbens       |
| Pons                    |
| Medulla                 |
| Spinal Cord             |
| Choroid Plexus          |

## Supplemental Table 5

Brain tissues stained by immunohistochemistry and found to not express CD19

| <b>Tissue stained</b>    |
|--------------------------|
| Cerebrum, frontal lobe   |
| Cerebrum, apical lobe    |
| Cerebrum, occipital lobe |
| Cerebrum, temporal lobe  |
| Cerebrum, midbrain       |
| Pons                     |
| Medulla oblongata        |
| Thalamus opticus         |
| Cerebellum               |
| Hippocampus              |
| Callositas               |
| Optic nerve              |
| Spinal cord              |

## Supplemental Table 6

Blood B-cell counts of the 3 patients with normal levels of polyclonal B cells pretreatment

| Patient | Pretreatment B-cell count | B-cell count 4 months post-treatment |
|---------|---------------------------|--------------------------------------|
| 1       | 291                       | 0                                    |
| 10      | 386                       | 1                                    |
| 15      | 142                       | 1                                    |

All other patients had either undetectable blood B cells or nearly all CLL B cells prior to anti-CD19 CAR T cell infusion, so normal B-cell depletion was not evaluable.

# Supplemental Table 7

Blood lymphocyte counts on the day of CAR T-cell infusion

| Patient | Blood lymphocyte count on the day of CAR T-cell infusion (units are x1000/ $\mu$ L) |
|---------|-------------------------------------------------------------------------------------|
| 1       | 0                                                                                   |
| 2       | 0.02                                                                                |
| 3       | 0.03                                                                                |
| 4       | 0                                                                                   |
| 5       | 0.02                                                                                |
| 6       | 0                                                                                   |
| 7       | 0                                                                                   |
| 8       | 0                                                                                   |
| 9       | 0.01                                                                                |
| 10      | 0.02                                                                                |
| 11      | 0.02                                                                                |
| 12      | 0.01                                                                                |
| 13      | 0.04                                                                                |
| 14      | 0.03                                                                                |
| 15      | 0.01                                                                                |



## Supplemental Table 8

### Prior treatments received by each patient before treatment on the anti-CD19 CAR T-cell trial

| Patient | Prior treatments                                                                                                                                                                                             |
|---------|--------------------------------------------------------------------------------------------------------------------------------------------------------------------------------------------------------------|
| 1       | %R, ^R-CVP, <sup>1</sup> R-CHOP, NCI anti-CD19 CAR clinical trial (current report is re-treatment)                                                                                                           |
| 2       | R-CHOP, @R-ICE, Methotrexate+ARA-C, X-ray therapy                                                                                                                                                            |
| 3       | chlorambucil+prednisone, FC                                                                                                                                                                                  |
| 4       | R-CHOP, R-ICE, CODOX-M+bortezomib                                                                                                                                                                            |
| 5       | fludarabine, fludarabine+mitoxantrone, pulse methylprednisolone, NCI FC+anti-CD19 CAR trial (current report is re-treatment)                                                                                 |
| 6       | *FC+rituximab                                                                                                                                                                                                |
| 7       | R-CHOP, R-ICE+lenalidomide, phase I clinical trial, X-ray therapy, R+cytarabine+etoposide                                                                                                                    |
| 8       | R-CHOP, R-ICE, brentuximab, R-high-dose ara-c, lenalidomide+rituximab, ^^R-GDP, X-ray therapy, 3 different phase I clinical trials                                                                           |
| 9       | ^^R-EPOCH, R-ICE, gemcitabine+oxaliplatin+rituximab                                                                                                                                                          |
| 10      | R-CHOP, X-ray therapy, R-ICE, high-dose chemotherapy+autologous stem cell transplant                                                                                                                         |
| 11      | fludarabine, fludarabine+R, bendamustine+R-2 different times, @@hyper-CVAD-2 different times, R-ICE, X-ray therapy, R+methylprednisolone, R+cisplatin+gemcitabine+dexamethasone, methotrexate+ara-C, R+Ara-C |
| 12      | R-CHOP, R-ICE, X-ray therapy                                                                                                                                                                                 |
| 13      | Fludarabine-2 different times, R, bendamustine+R                                                                                                                                                             |
| 14      | R-CHOP, ##R-ESHAP                                                                                                                                                                                            |
| 15      | R-CHOP, R-ICE, high-dose chemotherapy followed by autologous stem cell transplantation                                                                                                                       |

<sup>1</sup>R-CHOP=rituximab, cyclophosphamide, doxorubicin, vincristine, and prednisone

^R-CVP=rituximab, cyclophosphamide, vincristine, prednisone

@R-ICE=rituximab, ifosfamide, carboplatin, and etoposide

#R-DHAP=rituximab, dexamethasone, high-dose ara-c, and cisplatin

%R=rituximab

\*FC=fludarabine plus cyclophosphamide

\*\*CODOX-M=cyclophosphamide, cytarabine, vincristine, doxorubicin, methotrexate

^R-GDP=rituximab, gemcitabine, dexamethasone, cisplatin

^^R-EPOCH=rituximab, etoposide, prednisone, vincristine, cyclophosphamide, doxorubicin

@@hyper-CVAD=cyclophosphamide, vincristine, doxorubicin, dexamethasone

##R-ESHAP=etoposide, methylprednisolone, high-dose ara-c, cisplatin

## Supplemental Table 9

**Peak percentage of CD3+CAR+ T cells determined by flow cytometry and peak absolute numbers of CAR+ T cells determined by both flow cytometry and quantitative PCR**

| <b>Patient</b> | <b>Peak absolute number of CAR+ T cells (cells/<math>\mu</math>L) determined by qPCR</b> | <b>Peak absolute number Of CAR+ T cells (cells/<math>\mu</math>L) determined by flow cytometry</b> | <b>Peak percentage of Blood CD3+ cells that expressed the anti-CD19 CAR as determined by flow cytometry</b> |
|----------------|------------------------------------------------------------------------------------------|----------------------------------------------------------------------------------------------------|-------------------------------------------------------------------------------------------------------------|
| 1              | 115                                                                                      | 119                                                                                                | 8                                                                                                           |
| 2              | 60                                                                                       | 163                                                                                                | 33                                                                                                          |
| 3              | 86                                                                                       | 21                                                                                                 | 3                                                                                                           |
| 4              | 476                                                                                      | 375                                                                                                | 51                                                                                                          |
| 5              | 166                                                                                      | 45                                                                                                 | 27                                                                                                          |
| 6              | 28                                                                                       | 22                                                                                                 | 2                                                                                                           |
| 7              | 9                                                                                        | 2                                                                                                  | 2                                                                                                           |
| 8              | 14                                                                                       | 4                                                                                                  | 3                                                                                                           |
| 9              | 56                                                                                       | 30                                                                                                 | 49                                                                                                          |
| 10             | 33                                                                                       | 108                                                                                                | 28                                                                                                          |
| 11             | 22                                                                                       | 55                                                                                                 | 19                                                                                                          |
| 12             | 33                                                                                       | 28                                                                                                 | 11                                                                                                          |
| 13             | 50                                                                                       | 62                                                                                                 | 23                                                                                                          |
| 14             | 35                                                                                       | 25                                                                                                 | 42                                                                                                          |
| 15             | 777                                                                                      | 1056                                                                                               | 31                                                                                                          |

The peak absolute number of CAR+ T cells was first determined by qPCR as described in the Supplemental Methods then flow cytometry was performed on PBMC from the time-point of the peak in absolute number by using an anti-CAR monoclonal antibody as described in the Supplemental Methods. The absolute number of CAR+ T cells was determined by flow cytometry as described in the Supplemental Methods.

# Supplemental Figure 1

## Patient 15 pretreatment PBMC

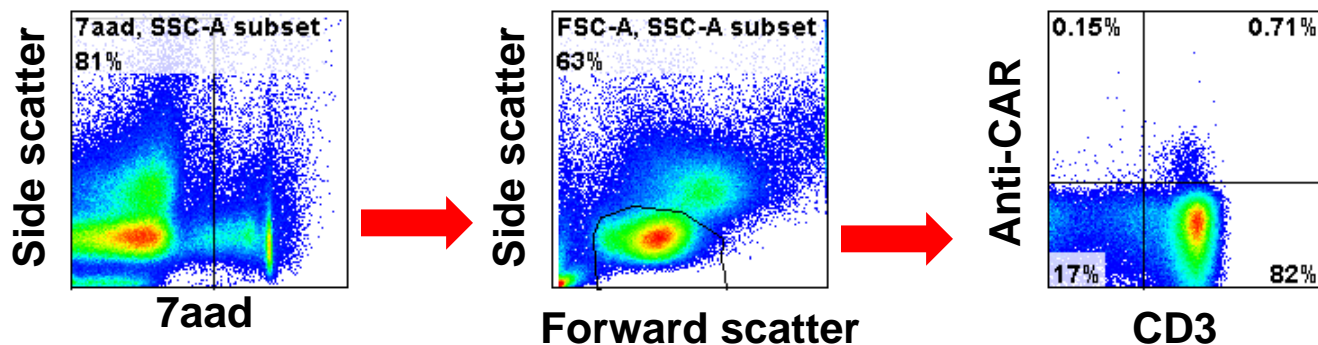

## Patient 15 PBMC collected 8 days after CAR T-cell infusion

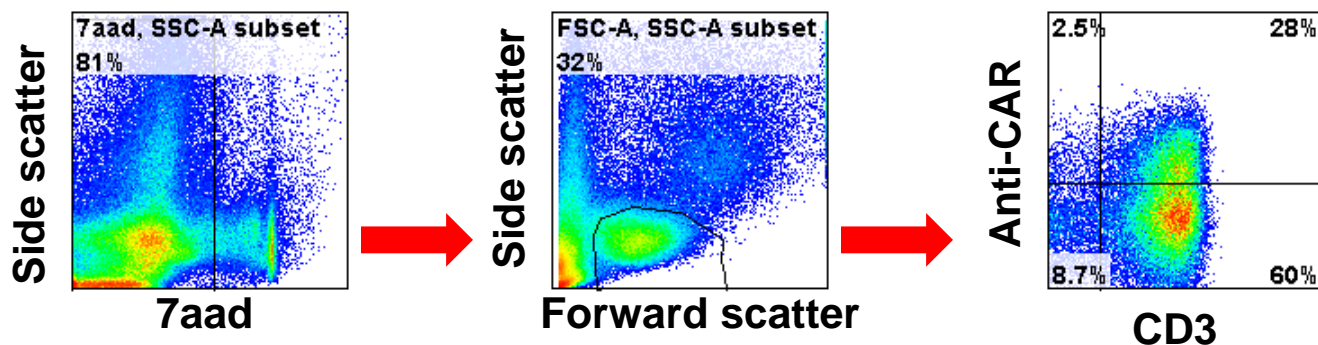

The gating strategy used for anti-CAR monoclonal antibody staining is shown. Dead cells were excluded with 7aad staining. A lymphocyte gate was drawn, and CD3 and anti-CAR staining of total lymphocytes was shown. The example shown is Patient 15 as. The monoclonal anti-CAR antibody used in Figures 3 and 5 was also used in this staining.
